# Supplementary material
Source: PubMed Central journal article supplement (PMC5549145)
Supplement: 10433_2013_294_MOESM1_ESM.pdf [file 10433_2013_294_MOESM1_ESM.pdf]

# Structured Ambivalence in Grandchild Care: The Quality of Life of European Grandparents – Tables and Figures and Supplemental Material

Franz Neuberger and Klaus Haberkern

## Contents

- 1 Tables and figures included in the paper** **2**
- 1.1 Descriptive figures ..... 2
- 1.2 Models ..... 3
- 2 Additional tables not included in the paper** **5**
- 2.1 Distribution of variables in countries under study ..... 5
- 2.2 Model comparison: ANOVA ..... 6
- 2.3 Additional tables for gender comparison ..... 6

# 1 Tables and figures included in the paper

## 1.1 Descriptive figures

Figure 1: Quality of life in countries under study

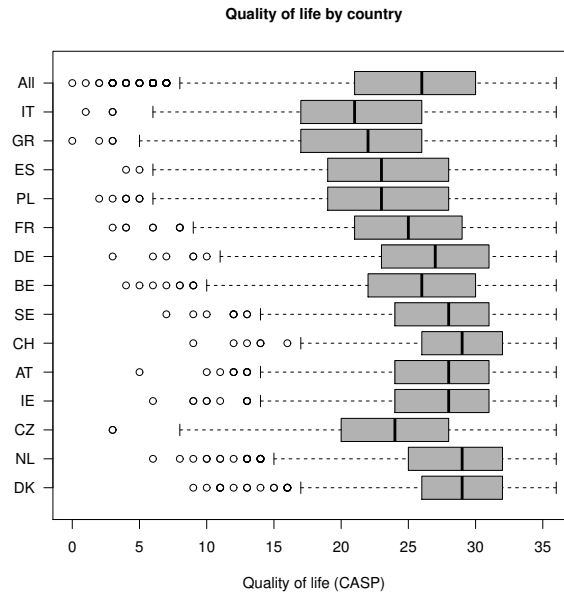

Data: SHARE, release 2.5.0; 12740 persons aged 50+ and their partners with at least one living child and grandchild; box-plots of quality of life overall and by country (CASP), own calculations.

Figure 2: Grandparenting norms and persons who provide grandchild care by country (%)

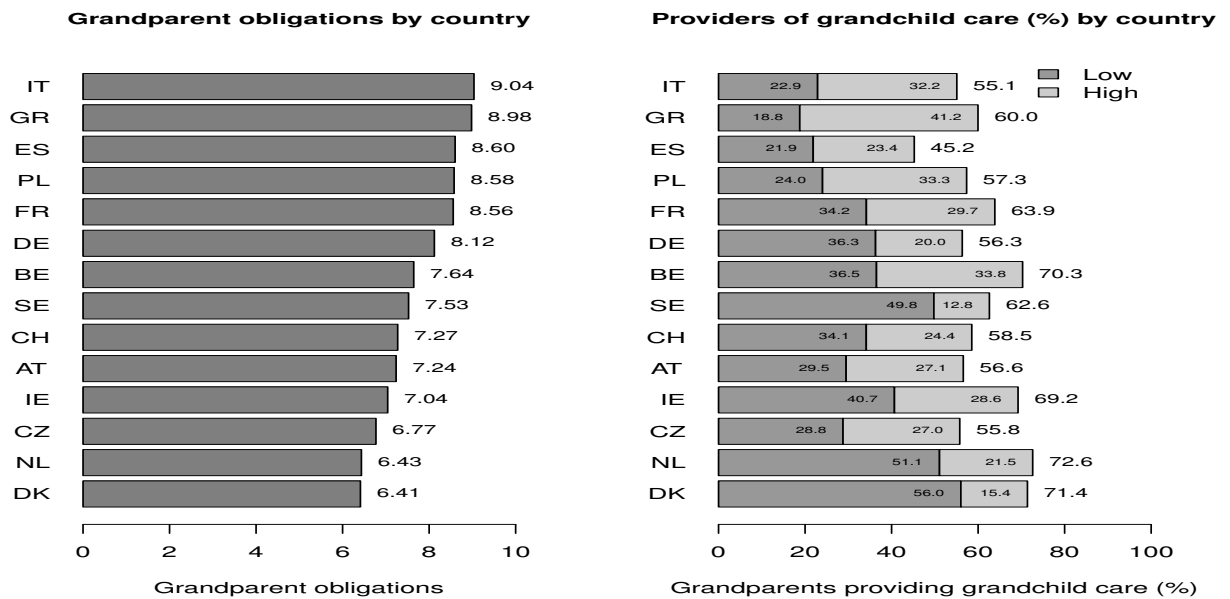

Data: SHARE, release 2.5.0; 12740 persons aged 50+ and their partners with at least one living child and grandchild; average grandparent obligations (left) and average grandchild care (low and high intensity care) provided by respondents by country (right), own calculations.

## 1.2 Models

Table 1: Grandchild care and quality of life

|                                             | Model 1            | Model 2            | Model 3            | Model 4            |
|---------------------------------------------|--------------------|--------------------|--------------------|--------------------|
| Constant                                    | 18.25***<br>(0.68) | 18.17***<br>(0.71) | 27.55***<br>(2.43) | 28.20***<br>(2.45) |
| Age in years                                | -0.05***<br>(0.01) | -0.05***<br>(0.01) | -0.05***<br>(0.01) | -0.05***<br>(0.01) |
| Gender: female/male                         | -0.26**<br>(0.10)  | -0.25**<br>(0.10)  | -0.25**<br>(0.10)  | -0.25**<br>(0.10)  |
| Health: (1=poor; 5=excellent)               | 1.83***<br>(0.04)  | 1.83***<br>(0.04)  | 1.83***<br>(0.04)  | 1.83***<br>(0.04)  |
| Education: medium/low                       | 0.49***<br>(0.11)  | 0.47***<br>(0.11)  | 0.48***<br>(0.11)  | 0.48***<br>(0.11)  |
| Education: high/low                         | 0.73***<br>(0.13)  | 0.72***<br>(0.13)  | 0.72***<br>(0.13)  | 0.72***<br>(0.13)  |
| Financial situation (1=difficult; 4=easily) | 1.67***<br>(0.05)  | 1.67***<br>(0.05)  | 1.67***<br>(0.05)  | 1.66***<br>(0.05)  |
| Status: unemployed/retired                  | -1.53***<br>(0.26) | -1.51***<br>(0.26) | -1.51***<br>(0.26) | -1.51***<br>(0.26) |
| Status: homemaker/retired                   | -0.43**<br>(0.15)  | -0.43**<br>(0.15)  | -0.43**<br>(0.15)  | -0.43**<br>(0.15)  |
| Status: permanently sick/retired            | -1.74***<br>(0.23) | -1.71***<br>(0.23) | -1.72***<br>(0.23) | -1.71***<br>(0.23) |
| Status: employed/retired                    | -0.44**<br>(0.13)  | -0.43**<br>(0.13)  | -0.43**<br>(0.13)  | -0.43**<br>(0.13)  |
| Foreign country of birth                    | -0.34<br>(0.18)    | -0.34<br>(0.18)    | -0.33<br>(0.18)    | -0.33<br>(0.18)    |
| Living with partner/single                  | 0.29*<br>(0.12)    | 0.30*<br>(0.12)    | 0.30*<br>(0.12)    | 0.30*<br>(0.12)    |
| Coresiding grandchildren aged <13           | -0.44**<br>(0.15)  | -0.48**<br>(0.15)  | -0.47**<br>(0.15)  | -0.48**<br>(0.15)  |
| Instrumental support to someone else        | -0.08<br>(0.09)    | -0.08<br>(0.09)    | -0.08<br>(0.09)    | -0.08<br>(0.09)    |
| High-intensity care                         | 0.16<br>(0.11)     | 0.11<br>(0.12)     | 0.13<br>(0.12)     | 0.11<br>(0.12)     |
| Provided grandchild care                    | 0.45***<br>(0.10)  | 0.46**<br>(0.16)   | 0.46**<br>(0.15)   | -2.33*<br>(1.03)   |
| Grandparent obligations                     |                    |                    | -1.21***<br>(0.30) | -1.30***<br>(0.31) |
| Grandchild care × grandparent obligations   |                    |                    |                    | 0.36**<br>(0.13)   |
| Random intercept variance                   | 1.877              | 2.270              | 0.930              | 0.939              |
| Grandchild care                             |                    | 0.193              | 0.176              | 0.081              |
| Residual                                    | 23.211             | 23.169             | 23.170             | 23.170             |
| Deviance                                    | 76259.79           | 76248.62           | 76240.07           | 76233.58           |
| N                                           | 12740              | 12740              | 12740              | 12740              |

Model 1: Hierarchical linear model (HLM) with random intercept; Model 2: HLM with random effect for grandchild care; Model 3: HLM with macro indicator; Model 4: HLM with cross-level interaction. Data: SHARE, release 2.5.0; 12740 grandparents aged 50+ with at least one living grandchild aged 12 years or younger; own calculations. Coefficients from REML estimation. Significance levels: '\*\*\*' 0.001, '\*\*' 0.01 and '\*' 0.05.

1 Tables and figures included in the paper

Figure 3: Random effects and conditional effect of grandchild care

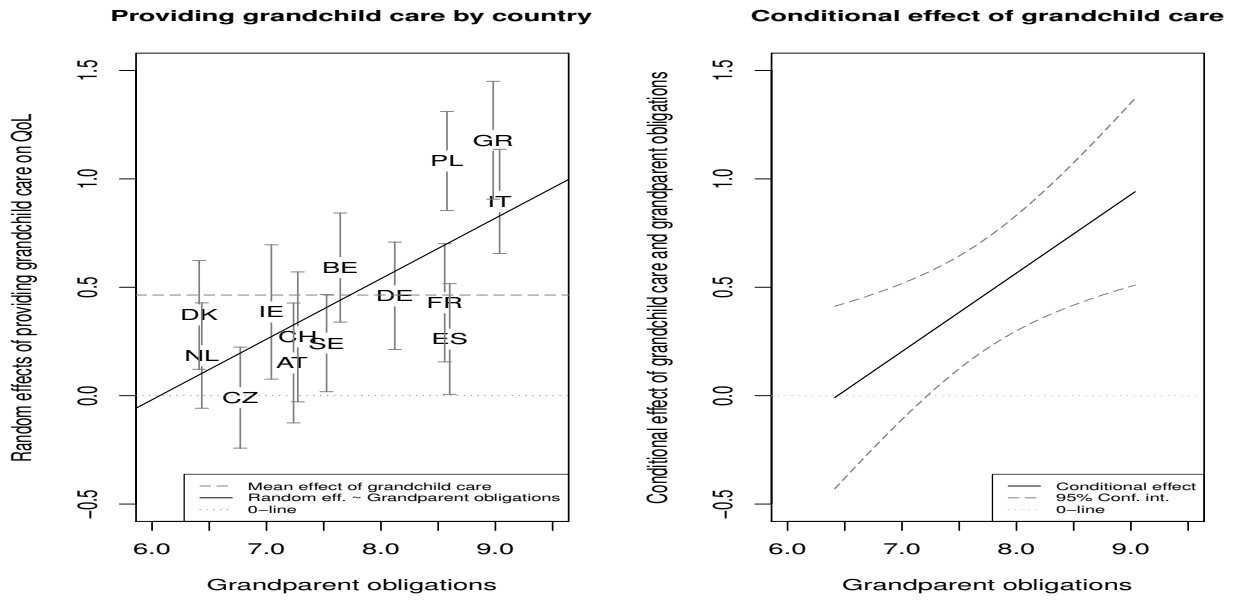

Data: SHARE, release 2.5.0; 12,740 persons aged 50+ and their partners with at least one living child and grandchild; random effects of providing grandchild care on quality of life (left) and conditional effect of providing grandchild care and of grandparent obligations (right); own calculations.

## 2 Additional tables not included in the paper

### 2.1 Distribution of variables in countries under study

Table 2: Per country distribution of variables

| Variables                                 | AT    | DE    | SE    | NL   | ES    | IT    | FR    | DK   | GR    | CH    | BE    | CZ     | PL    | IE    | All   |
|-------------------------------------------|-------|-------|-------|------|-------|-------|-------|------|-------|-------|-------|--------|-------|-------|-------|
| CASP                                      | 27.10 | 26.54 | 27.28 | 27.9 | 23.22 | 21.39 | 24.69 | 28.8 | 21.27 | 28.60 | 25.86 | 23.558 | 23.07 | 27.15 | 25.42 |
| (sd)                                      | 5.44  | 5.59  | 4.74  | 5.2  | 6.43  | 5.92  | 5.70  | 4.5  | 6.22  | 4.76  | 5.61  | 5.546  | 6.54  | 5.47  | 6.09  |
| Age in years                              | 63.36 | 63.32 | 63.99 | 63.9 | 66.47 | 65.49 | 62.64 | 63.1 | 65.38 | 65.33 | 62.87 | 60.802 | 61.90 | 65.41 | 63.63 |
| (sd)                                      | 7.55  | 7.70  | 7.83  | 7.6  | 8.21  | 7.52  | 8.02  | 8.0  | 8.25  | 8.37  | 7.83  | 6.460  | 8.15  | 8.09  | 7.92  |
| Female %                                  | 56.09 | 51.57 | 52.84 | 53.3 | 53.03 | 54.69 | 53.64 | 54.6 | 55.46 | 54.77 | 50.47 | 55.943 | 56.09 | 57.36 | 54.07 |
| Health: (1=poor; 5=excellent)             | 3.43  | 3.06  | 3.54  | 3.3  | 2.79  | 2.88  | 3.14  | 3.6  | 3.17  | 3.51  | 3.45  | 2.736  | 2.21  | 3.30  | 3.13  |
| (sd)                                      | 0.99  | 1.00  | 1.06  | 1.0  | 1.02  | 1.07  | 1.01  | 1.1  | 1.03  | 0.99  | 0.99  | 0.935  | 0.97  | 1.16  | 1.10  |
| Education: low %                          | 29.97 | 15.93 | 50.82 | 59.9 | 88.75 | 80.85 | 48.88 | 19.8 | 78.46 | 36.36 | 48.40 | 55.496 | 44.49 | 44.62 | 50.54 |
| Education: medium %                       | 51.28 | 57.20 | 28.51 | 22.4 | 6.06  | 15.30 | 35.71 | 44.4 | 17.76 | 56.76 | 26.23 | 35.299 | 48.41 | 17.80 | 32.72 |
| Education: high %                         | 18.75 | 26.87 | 20.67 | 17.7 | 5.19  | 3.85  | 15.41 | 35.8 | 3.78  | 6.87  | 25.38 | 9.205  | 7.10  | 37.58 | 16.73 |
| Fin. Sit. (1=difficult; 4=easily)         | 2.97  | 3.04  | 3.27  | 3.2  | 2.29  | 2.23  | 2.77  | 3.4  | 2.00  | 3.27  | 3.04  | 2.366  | 2.02  | 2.84  | 2.77  |
| (sd)                                      | 0.77  | 0.89  | 0.78  | 0.8  | 0.87  | 0.85  | 0.92  | 0.8  | 0.90  | 0.82  | 0.92  | 0.806  | 0.80  | 0.94  | 0.97  |
| Status: unemployed %                      | 3.21  | 6.61  | 2.39  | 1.7  | 4.08  | 1.58  | 3.64  | 3.2  | 1.75  | 1.33  | 5.38  | 3.217  | 4.42  | 1.98  | 3.27  |
| Status: homemaker %                       | 12.18 | 11.38 | 0.82  | 27.4 | 35.11 | 25.77 | 10.92 | 1.0  | 31.00 | 11.09 | 16.23 | 0.089  | 5.09  | 24.40 | 13.94 |
| Status: permanently sick %                | 1.12  | 2.49  | 2.54  | 7.7  | 4.57  | 1.09  | 2.94  | 4.5  | 0.87  | 2.44  | 3.96  | 2.324  | 12.52 | 6.37  | 4.25  |
| Status: employed %                        | 17.31 | 27.52 | 39.78 | 21.8 | 12.98 | 11.85 | 27.59 | 39.8 | 16.59 | 32.15 | 21.70 | 32.082 | 14.69 | 23.96 | 24.80 |
| Status: retired %                         | 66.19 | 52.00 | 54.48 | 41.5 | 43.26 | 59.72 | 54.90 | 51.5 | 49.78 | 52.99 | 52.74 | 62.288 | 63.27 | 43.30 | 53.74 |
| Foreign country of birth %                | 7.53  | 18.63 | 7.99  | 3.5  | 3.21  | 1.48  | 15.13 | 2.8  | 1.60  | 15.30 | 6.60  | 4.468  | 2.84  | 7.91  | 6.44  |
| Living with partner %                     | 72.60 | 87.32 | 86.94 | 88.7 | 87.14 | 87.27 | 81.23 | 82.1 | 79.04 | 76.94 | 82.55 | 80.340 | 84.06 | 72.31 | 83.22 |
| Coresiding grandchildren aged <13 %       | 14.26 | 11.38 | 0.75  | 1.6  | 13.97 | 16.98 | 2.80  | 1.5  | 22.56 | 3.99  | 3.11  | 16.801 | 34.72 | 5.27  | 10.82 |
| Instrumental support to someone else %    | 33.81 | 37.38 | 47.46 | 47.2 | 19.28 | 28.63 | 38.66 | 49.7 | 24.16 | 35.25 | 43.21 | 39.231 | 25.46 | 39.78 | 37.34 |
| Provided grandchild care %                | 56.57 | 56.34 | 62.61 | 72.6 | 45.24 | 55.08 | 63.87 | 71.4 | 59.97 | 58.54 | 70.28 | 55.764 | 57.35 | 69.23 | 61.46 |
| Provided no grandchild care %             | 43.43 | 43.66 | 37.39 | 27.4 | 54.76 | 44.92 | 36.13 | 28.6 | 40.03 | 41.46 | 29.72 | 44.236 | 42.65 | 30.77 | 38.54 |
| Low-intensity care (1-8 hours per week) % | 29.49 | 36.29 | 49.78 | 51.1 | 21.88 | 22.90 | 34.17 | 56.0 | 18.78 | 34.15 | 36.51 | 28.776 | 24.04 | 40.66 | 35.77 |
| High-intensity care (>8 hours per week) % | 27.08 | 20.04 | 12.84 | 21.5 | 23.36 | 32.18 | 29.69 | 15.4 | 41.19 | 24.39 | 33.77 | 26.988 | 33.31 | 28.57 | 25.69 |
| MACRO: Grandparent obligations            | 7.24  | 8.12  | 7.53  | 6.4  | 8.60  | 9.04  | 8.56  | 6.4  | 8.98  | 7.27  | 7.64  | 6.771  | 8.58  | 7.04  | 7.69  |
| N                                         | 624   | 923   | 1340  | 1249 | 809   | 1013  | 714   | 1098 | 687   | 451   | 1060  | 1119   | 1198  | 455   | 12740 |

Data: SHARE, release 2.5.0; 12740 grandparents aged 50+ with at least one living grandchild aged 12 years or younger; own calculations.

## 2.2 Model comparison: ANOVA

Table 3: ANOVA of Model 1 and 2

|         | Df     | AIC       | BIC       | logLik     | Chisq  | Chi Df | Pr(>Chisq) |
|---------|--------|-----------|-----------|------------|--------|--------|------------|
| Model.1 | 19.000 | 76297.786 | 76439.383 | -38129.893 |        |        |            |
| Model.2 | 21.000 | 76290.620 | 76447.122 | -38124.310 | 11.166 | 2.000  | 0.004      |

Table 4: ANOVA of Model 3 and 4

|         | Df     | AIC       | BIC       | logLik     | Chisq | Chi Df | Pr(>Chisq) |
|---------|--------|-----------|-----------|------------|-------|--------|------------|
| Model.3 | 22.000 | 76284.068 | 76448.023 | -38120.034 |       |        |            |
| Model.4 | 23.000 | 76279.579 | 76450.987 | -38116.790 | 6.489 | 1.000  | 0.011      |

## 2.3 Additional tables for gender comparison

Table 9 on the next page provides gender-specific estimations of Model 3 and Model 4. We found no fundamental differences between the models for men and women. Both models without interaction term show positive effects of providing grandchild care. Both effects turn negative when the interaction effect with the grandchild care norm is included (Model 4). Considering the significance of the effect, the effect of grandchild care in Model 3 for males is not significant at the 5 % level, neither is the interaction effect, but both are close. Table 5 reveals that the introduction of the interaction term significantly improves our Model at the 10 % level.

This difference in significance levels could be explained by the number of cases. Table 7 shows that in general, more women than men provide support. Considering the intensity, Table 8 shows that women provide not only more but also more intensive support. Yet since we are not interested in the frequency of support but in its relation to quality of life, we do not provide separate models for men and women. Although the effects tend to be stronger and more significant for women than for men, we have no reason to assume a gender-specific mechanism regarding the relation of grandchild care and QoL. Therefore, we do not provide separate models for grandmothers and grandfather in the manuscript.

Table 5: ANOVA of Male Model 3 and 4

|              | Df     | AIC       | BIC       | logLik     | Chisq | Chi Df | Pr(>Chisq) |
|--------------|--------|-----------|-----------|------------|-------|--------|------------|
| Model.3.Male | 21.000 | 34810.691 | 34950.856 | -17384.345 |       |        |            |
| Model.4.Male | 22.000 | 34809.449 | 34956.289 | -17382.724 | 3.242 | 1.000  | 0.072      |

Table 6: ANOVA of Female Model 3 and 4

|                | Df     | AIC       | BIC       | logLik     | Chisq | Chi Df | Pr(>Chisq) |
|----------------|--------|-----------|-----------|------------|-------|--------|------------|
| Model.3.Female | 21.000 | 41478.059 | 41621.647 | -20718.029 |       |        |            |
| Model.4.Female | 22.000 | 41472.177 | 41622.603 | -20714.089 | 7.881 | 1.000  | 0.005      |

Table 7: Support by Gender

|        | no   | yes  |
|--------|------|------|
| Male   | 2648 | 3204 |
| Female | 2262 | 4626 |

2 Additional tables not included in the paper

Table 8: Intensity of Support by Gender

|        | 0 hours | 1-8 hours | >8 hours |
|--------|---------|-----------|----------|
| Male   | 2648    | 2023      | 1181     |
| Female | 2262    | 2534      | 2092     |

Table 9: Grandchild care and quality of life

|                                             | Model 3 Male       | Model 4 Male       | Model 3 Female     | Model 4 Female     |
|---------------------------------------------|--------------------|--------------------|--------------------|--------------------|
| Constant                                    | 26.01***<br>(2.57) | 27.41***<br>(2.70) | 30.23***<br>(2.36) | 29.30***<br>(2.44) |
| Age in years                                | -0.06***<br>(0.01) | -0.06***<br>(0.01) | -0.05***<br>(0.01) | -0.05***<br>(0.01) |
| Health: (1=poor; 5=excellent)               | 1.70***<br>(0.06)  | 1.70***<br>(0.06)  | 1.93***<br>(0.06)  | 1.93***<br>(0.06)  |
| Education: medium/low                       | 0.56***<br>(0.16)  | 0.56***<br>(0.16)  | 0.45**<br>(0.14)   | 0.45**<br>(0.14)   |
| Education: high/low                         | 0.92***<br>(0.18)  | 0.92***<br>(0.18)  | 0.57**<br>(0.20)   | 0.57**<br>(0.20)   |
| Financial situation (1=difficult; 4=easily) | 1.56***<br>(0.08)  | 1.56***<br>(0.08)  | 1.76***<br>(0.07)  | 1.76***<br>(0.07)  |
| Status: unemployed/retired                  | -1.94***<br>(0.37) | -1.94***<br>(0.37) | -1.21***<br>(0.36) | -1.21***<br>(0.36) |
| Status: homemaker/retired                   | -1.69<br>(1.12)    | -1.69<br>(1.12)    | -0.36*<br>(0.17)   | -0.35*<br>(0.17)   |
| Status: permanently sick/retired            | -1.55***<br>(0.33) | -1.55***<br>(0.33) | -1.94***<br>(0.32) | -1.92***<br>(0.32) |
| Status: employed/retired                    | -0.42*<br>(0.19)   | -0.42*<br>(0.19)   | -0.50**<br>(0.19)  | -0.48*<br>(0.19)   |
| Foreign country of birth                    | -0.49<br>(0.26)    | -0.49<br>(0.26)    | -0.20<br>(0.24)    | -0.21<br>(0.24)    |
| Living with partner/single                  | 0.34<br>(0.23)     | 0.35<br>(0.23)     | 0.20<br>(0.15)     | 0.20<br>(0.15)     |
| Coresiding grandchildren aged <13           | -0.21<br>(0.22)    | -0.21<br>(0.22)    | -0.69***<br>(0.20) | -0.71***<br>(0.20) |
| Instrumental support to someone else        | 0.14<br>(0.13)     | 0.14<br>(0.13)     | -0.24<br>(0.13)    | -0.24<br>(0.13)    |
| High-intensity care                         | 0.20<br>(0.18)     | 0.18<br>(0.18)     | 0.13<br>(0.15)     | 0.09<br>(0.15)     |
| Provided grandchild care                    | 0.40<br>(0.21)     | -2.43<br>(1.56)    | 0.51**<br>(0.18)   | -3.02*<br>(1.18)   |
| Grandparent obligations                     | -0.91**<br>(0.31)  | -1.09***<br>(0.33) | -1.65***<br>(0.29) | -1.53***<br>(0.30) |
| Grandchild care × grandparent obligations   |                    | 0.37<br>(0.20)     |                    | 0.46**<br>(0.15)   |
| Random intercept variance                   | 1.034              | 1.033              | 0.758              | 0.797              |
| Grandchild care                             | 0.312              | 0.213              | 0.136              | 0.031              |
| Residual                                    | 22.139             | 22.141             | 23.892             | 23.881             |
| Deviance                                    | 34768.69           | 34765.45           | 41436.06           | 41428.18           |
| N                                           | 5852               | 5852               | 6888               | 6888               |

Data: SHARE, release 2.5.0; 12740 grandparents aged 50+ with at least one living grandchild aged 12 years or younger; own calculations. Coefficients from REML estimation. Significance levels: '\*\*\*' 0.001, '\*\*' 0.01 and '\*' 0.05.
